# Supplementary material
Source: MDPI journal article supplement (https://www.mdpi.com/2073-4395/12/5/1159)

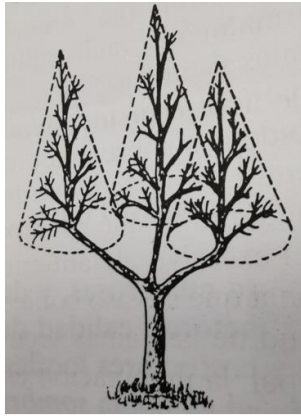

Vase

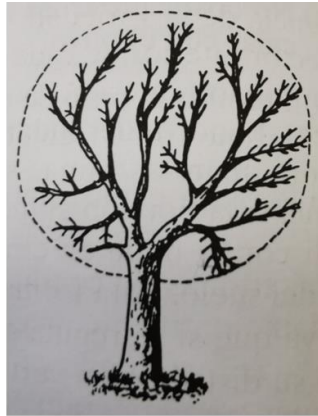

Globe

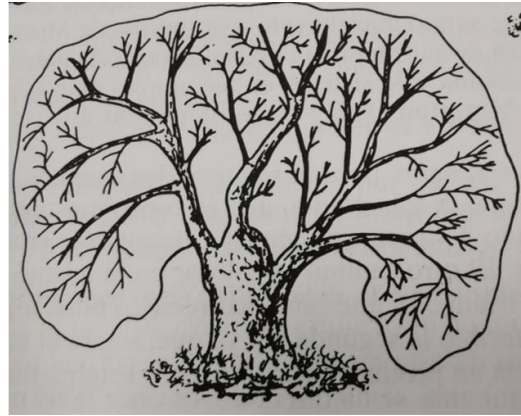

Natural

**Figure S1.** Tree pruning types.

Supplement: s1 [file s1]
